# Supplementary material for: A systematic study of Ga- and N-polar GaN nanowire–shell growth by metal organic vapor phase epitaxy
Source: Royal Society of Chemistry journal article supplement (doi:10.1039/d0ce00693a), 2020-01-01
Supplement: d0ce00693a1.pdf [file d0ce00693a1.pdf]

## Supporting Information

### S1) Detailed explanation of NW-MOVPE

In this section, information about substrate preparation and MOVPE NW growth processes are given. First, the process for self-catalyzed dominant N-polar NW growth is presented, followed by the polarity- and site-controlled (PSCG) growth of Ga-polar NWs. For both types of NWs, As-doped n-type Si(111)-substrates ( $\rho_{Si} = 1 \times 10^{-3} \Omega cm$ ) are used.

#### **Self-catalyzed growth of GaN NWs (N-polar)**

Without any surface preparation, the Si substrates are loaded inside the close-coupled showerhead MOVPE reactor. Under constant  $H_2$  flow, the temperature is ramped to  $T_S = 910^\circ C$ , determined by *in-situ* pyrometry on the substrate surface. The reactor conditions are kept constant for the next 600 s to remove the native oxide from the substrate surface. All parameters for this step and the following nitride growth are listed in Table 1.

**Table 1.** Growth procedure for self-catalyzed dominant N-polar NWs.

| <b>self-catalyzed NWs</b>          | $T_S$<br>[ $^\circ C$ ] | t<br>[s]              | p<br>[mbar] | $Q_{TMGa/Al}$<br>[ $\frac{\mu mol}{min}$ ] | $Q_{NH_3}$<br>[ $\frac{mmol}{min}$ ] | $Q_{SiH_4}$<br>[ $\frac{nmol}{min}$ ] | $Q_{N_2}$<br>[sccm] | $Q_{H_2}$<br>[sccm] |
|------------------------------------|-------------------------|-----------------------|-------------|--------------------------------------------|--------------------------------------|---------------------------------------|---------------------|---------------------|
| native Oxide removal by $H_2$ bake | 910                     | 600                   | 100         | --                                         | --                                   | --                                    | --                  | 8000                |
| AlN interlayer                     | 1060                    | 150                   | 100         | 10                                         | 67                                   | --                                    | --                  | 8000                |
| GaN nucleation                     | 1000                    | 30                    | 100         | 137                                        | 2.9                                  | --                                    | 7873                | --                  |
| three steps GaN NW growth          | 1030                    | 300<br>1100/300<br>50 | 800         | 137                                        | 4.9                                  | 202<br>5.6<br>0                       | 1662                | 166                 |

Next, a 20 nm thin AlN interlayer is grown by injecting TMAI and  $NH_3$  at a V/III ratio of 6700 to avoid Ga melt-back etching during the following GaN growth. Randomly distributed and mixed polar GaN seeds are established by changing the reactor conditions to the “GaN

nucleation” conditions (Table 1) and injecting TMGa and NH<sub>3</sub> (V/III ratio  $\approx$  21). After this nucleation step, the metalorganic supply is stopped, and reactor pressure and total gas flow are adjusted for NW growth. Next, the NW growth is initiated by injection of TMGa and SiH<sub>4</sub>. The Si and N atoms form silicon nitride (SiN<sub>x</sub>), which passivates the *m*-planar shell, suppresses the lateral growth and thereby promotes the vertical NW growth.<sup>55,86</sup> During the initial 300 s of NW growth, a high SiH<sub>4</sub> flow is necessary to additionally passivate small parasitic nucleation sites, thereby localizing the growth on the thicker NW seeds. Next, the SiH<sub>4</sub> flow is decreased, since NWs with smoother shells are attained at this flow. The duration of the last step has been changed to obtain different total NW core lengths of 4  $\mu$ m or 7.6  $\mu$ m. Finally, the NW upper part (< 300 nm) is grown without any silane to circumvent the SiN<sub>x</sub> passivation on the NW top, which may otherwise affect the subsequent shell growth. NWs grown under these conditions are highly n-doped, as was shown in reference<sup>39</sup>.

The surface passivation by H is critical to attain NW growth. H-atoms passivate N-terminated surfaces and, thus, strongly influence the growth kinetics, which leads to different observable crystal facets, growth rates and growth directions. *c*-facet surface termination of Ga- and N-polar wurtzite crystal planes are inverted, which leads to a strong influence of H, strongly influenced by the  $x_{H_2}$ . In the here used mixed polar approach, a  $x_{H_2}$  of 9 % is used to promote the N-polar growth.

### **Polarity- and Site-controlled growth of GaN NWs (Ga-polar)**

The basic conditions to achieve PSCG are, i) realizing separated growth locations of each polarity, and ii) the different growth rates of Ga- and N-polar GaN. We have shown in references<sup>54,72</sup> that a distinct *ex-situ* oxidation of a structured Si-substrate, followed by an *in-situ* H<sub>2</sub>-bake inside the MOVPE system leads to Al- or N-polar AlN nucleation on specific

Si crystal planes. To use this effect for selective area epitaxy, a Si-substrate was structured by NanoImprint lithography and dry etching. Thereby, hexagonally arranged Si pillars were manufactured (100 nm high, diameter of 500 nm, pitch of 2.5  $\mu\text{m}$ ), which exhibit crystal facets at their sides, leading to Me-polar growth. Everywhere else, N-polar growth is initiated. This leads to PSCG of AlN, and thus condition i) is achieved. On top of the Al-polar AlN sites, first Ga-polar GaN islands and then Ga-polar NWs are attained by choosing adequate growth conditions for each step. The NW growth is separated in two steps indicated by an increase of  $\text{NH}_3$  flow after the first 10 s. The two-step  $\text{NH}_3$  flow is crucial to suppress multi-pod growth and to realize homogeneous epitaxy of NWs on all GaN islands. A detailed explanation and discussion of the sample preparation, the surface termination and the growth process can be found in references <sup>54,72</sup>. The parameters for each step carried out in the MOVPE system are summarized in Table 2.

**Table 2.** Procedure for Ga-polar NWs on polarity- and site-controlled AlN/Si-templates.

| <b>polarity- and site-controlled Ga-polar NWs</b>                        | $T_S$<br>[ $^{\circ}\text{C}$ ] | t<br>[s]   | p<br>[mbar] | $Q_{\text{TMGa/Al}}$<br>[ $\frac{\mu\text{mol}}{\text{min}}$ ] | $Q_{\text{NH}_3}$<br>[ $\frac{\text{mmol}}{\text{min}}$ ] | $Q_{\text{SiH}_4}$<br>[ $\frac{\text{nmol}}{\text{min}}$ ] | $Q_{\text{N}_2}$<br>[sccm] | $Q_{\text{H}_2}$<br>[sccm] |
|--------------------------------------------------------------------------|---------------------------------|------------|-------------|----------------------------------------------------------------|-----------------------------------------------------------|------------------------------------------------------------|----------------------------|----------------------------|
| ex-situ fabricated<br>SiO <sub>x</sub> removal<br>by H <sub>2</sub> bake | 930                             | 420        | 100         | --                                                             | --                                                        | --                                                         | --                         | 8000                       |
| AlN interlayer                                                           | 930                             | 150        | 100         | 7.5                                                            | 18.5                                                      | --                                                         | --                         | 8000                       |
| PSCG:<br>GaN islands                                                     | 870                             | 70         | 800         | 72.8                                                           | 0.3                                                       | 107                                                        | 1670                       | 323                        |
| two steps<br>NW growth                                                   | 830<br>830                      | 10<br>1800 | 800         | 55<br>55                                                       | 0.7<br>1.5                                                | 288                                                        | 1920                       | 64.5                       |

S2) N-polar CS-NW: additional SEM images

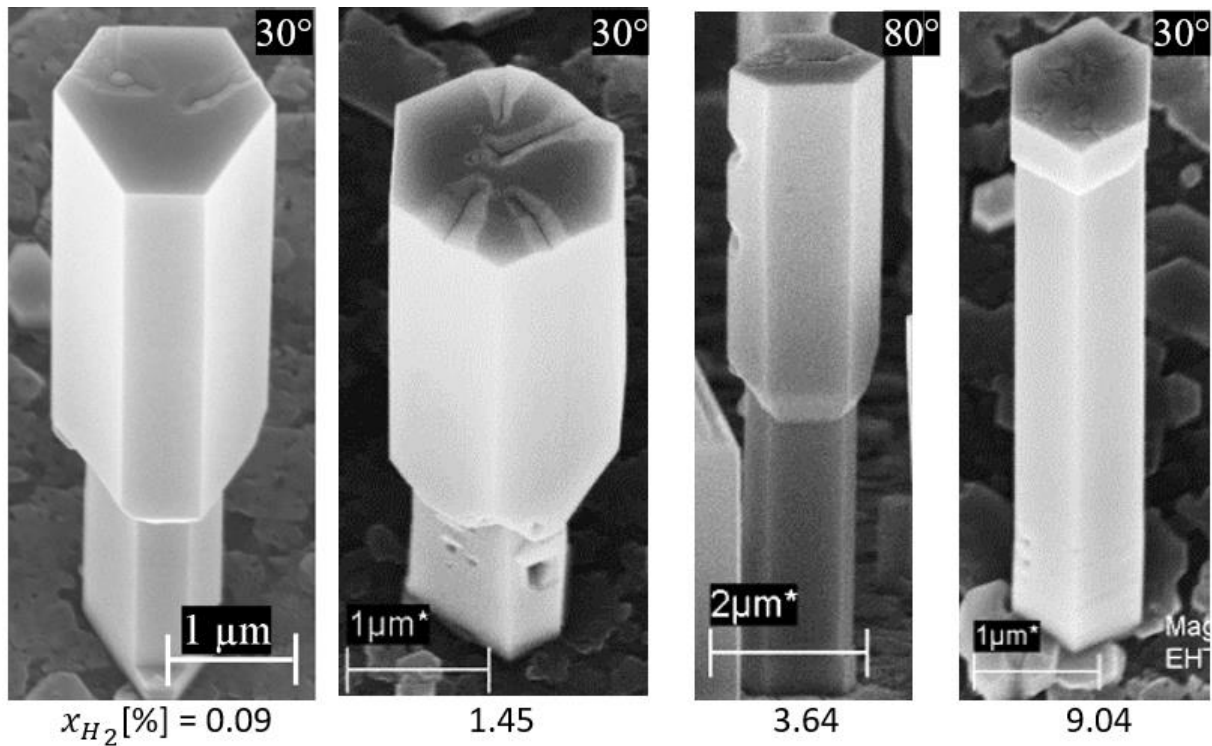

**Figure SI 1.** Shell growth on self-catalyzed NWs for different carrier gas ratios  $x_{H_2}$ .

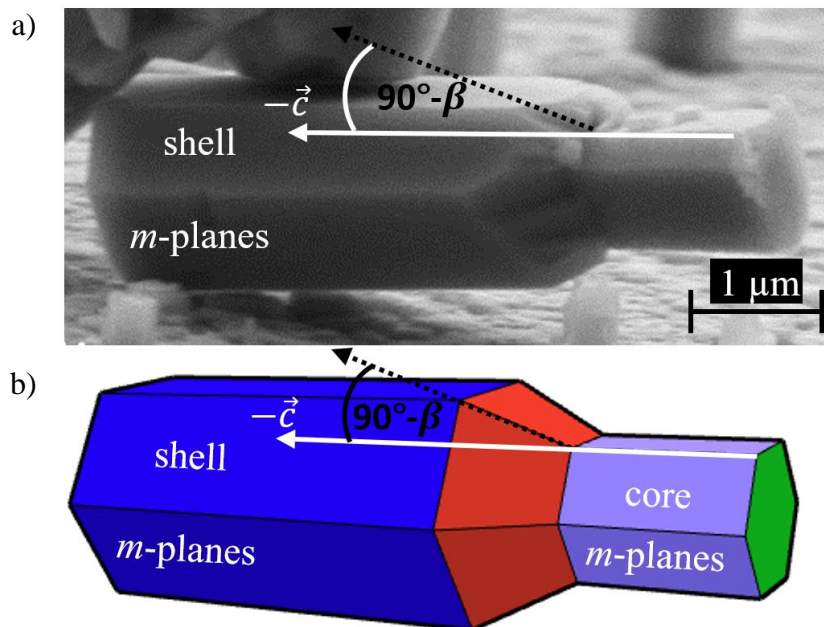

**Figure SI 2.** SEM image (a) and sketch (b) of a detached N-polar CS NW. All m-planes are blue (bright blue for core), the c-facet is green and the determined tilted facets are red colored.

S3) Ga-polar CS-NW: additional SEM images

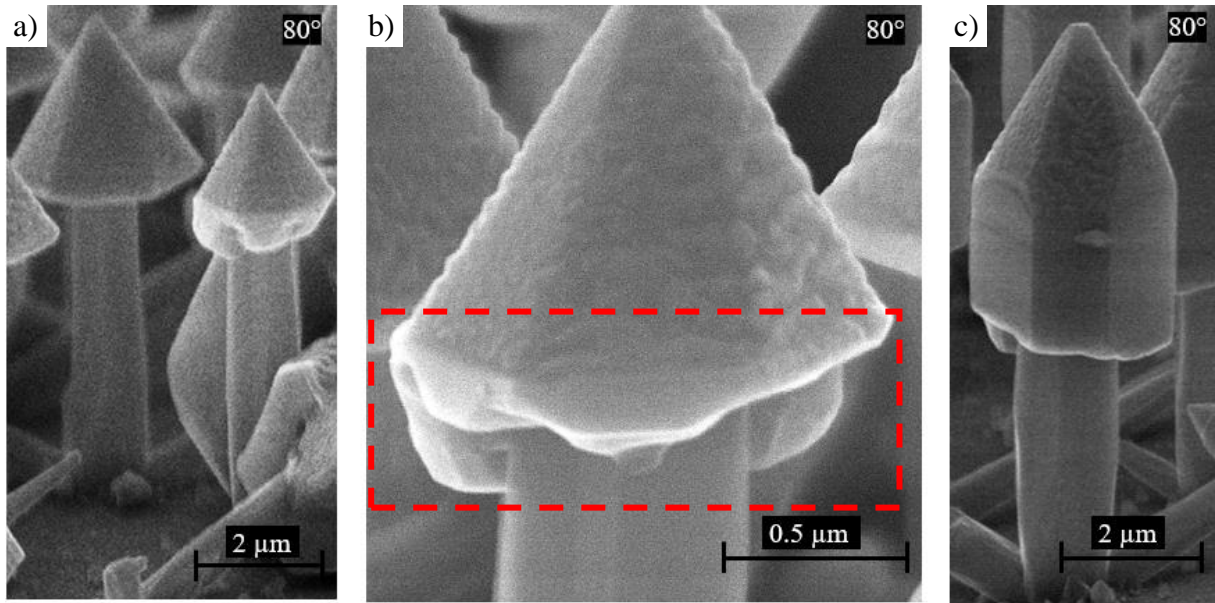

**Figure SI 3.** Shells grown on Ga polar NWs at  $x_{H_2}$  of 9 % (a and b) and 50 % (c). An initial m-planar growth is highlighted by a red box in b.
